# Supplementary material
Source: publisher figshare collection journal article supplement (https://gsapubs.figshare.com/articles/dataset/_/12539996)
Supplement: Supplementary file 1 [file 1]

## Data Repository Item for: *Dimensions of fluvial-tidal meanders: are they disproportionally large?*

Jasper R.F.W. Leuven, Barend van Maanen, Bente R. Lexmond, Bram V. van der Hoek, Matthijs J. Spruijt, Maarten G. Kleinhans

*Faculty of Geosciences, Utrecht University, PObox 80115, 3508 TC Utrecht, The Netherlands*

---

---

### Contents

1. Figure DR1: Definition of the tidal limit in the dataset.
2. Figure DR2: Normalized along-channel width profiles of all systems used.
3. Figure DR3: Schematic figure of meander definitions in this study.
4. Figure DR4: Along-channel profiles of meander length and amplitude.
5. Figure DR5: Locations with indicators of possible human influence.
6. Figure DR6: Examples of meanders with a high sinuosity.
7. Table DR1: Empirical and theoretical relations for meander dimensions.
8. Table DR2: Rivers used in this study for meander measurements.

### Additional Data (Files in .zip)

1. KML: A kml-file with the meander polygons used in this study (see Table DR2).

---

\*Corresponding author: Jasper R.F.W. Leuven

Email address: [j.r.f.w.leuven@uu.nl](mailto:j.r.f.w.leuven@uu.nl) (Jasper R.F.W. Leuven)

Preprint submitted to *Geology*

July 31, 2018

## 1. References

- Ferguson, R. I., 1975. Meander irregularity and wavelength estimation. *Journal of Hydrology* 26 (3-4), 315–333.
- Hey, R., 1982. Design equations for mobile gravel-bed rivers. by RD Hey, JC Bathurst, and CR Thorne. John Wiley and Sons, Ltd, 553–574.
- Hey, R. D., Thorne, C. R., 1986. Stable channels with mobile gravel beds. *Journal of Hydraulic Engineering* 112 (8), 671–689.
- Inglis, C., 1949. The behavior and control of rivers and canals, central water-power irrigation and navigation res. Sta., Poona: Res. Pub 13 (2).
- Kleinhans, M. G., van den Berg, J. H., 2011. River channel and bar patterns explained and predicted by an empirical and a physics-based method. *Earth Surface Processes and Landforms* 36 (6), 721–738.
- Leopold, L. B., Wolman, M. G., 1960. River meanders. *Geological Society of America Bulletin* 71 (6), 769–793.
- Leuven, J. R. F. W., Kleinhans, M. G., Weisscher, S. A. H., van der Vegt, M., October 2016. Tidal sand bar dimensions and shapes in estuaries. *Earth-science reviews* 161, 204–233.
- Marani, M., Lanzoni, S., Zandolin, D., Seminara, G., Rinaldo, A., 2002. Tidal meanders. *Water Resources Research* 38 (11).
- Seminara, G., 2006. Meanders. *Journal of fluid mechanics* 554, 271–297.
- Williams, G. P., 1986. River meanders and channel size. *Journal of hydrology* 88 (1-2), 147–164.

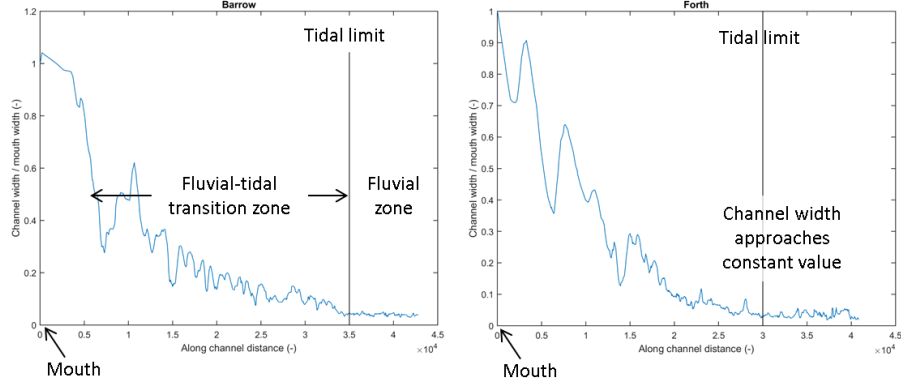

Figure 1: Along-channel width profiles. The tidal limit was manually selected as the point where the channel width approaches a constant value. The zone seaward of this point is defined as the fluvial-tidal transition zone and the landward zone as the fluvial zone. The distance to the tidal limit is used to normalise along-channel distance.

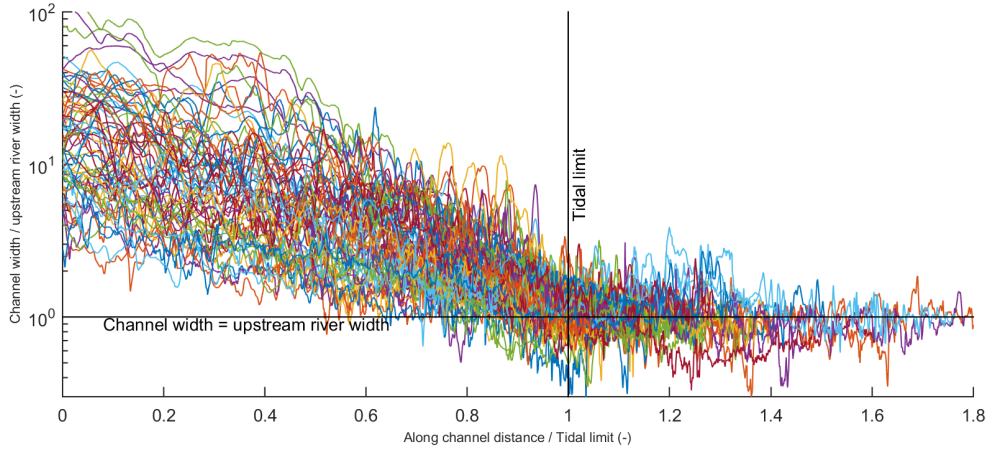

Figure 2: Normalized along-channel width profiles of all systems used. Channel width normalised by the width of the upstream river (y-axis) as a function of along-channel distance normalised by along-channel distance to the tidal limit as defined in Suppl. Fig. 1.

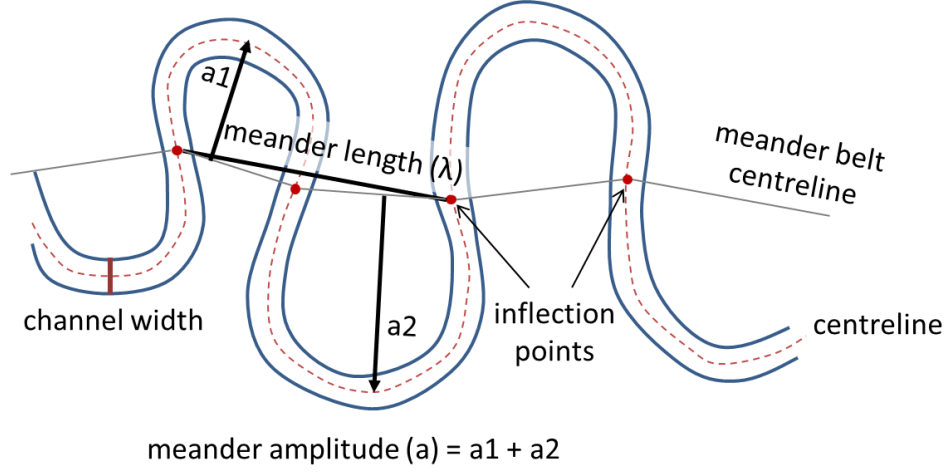

Figure 3: Schematic figure of meander definitions in this study.

Table 1: Empirical and theoretical relations for meander dimensions. All constants have been recalculated, such that all equations are in meters.

| Property          | Relation                        | Author                    | Environment            |
|-------------------|---------------------------------|---------------------------|------------------------|
| Meander length    | $\lambda = 11.0 \cdot b^{1.01}$ | Leopold and Wolman (1960) | Rivers                 |
|                   | $\lambda = 6.52 \cdot b^{0.99}$ | Inglis (1949)             | Rivers                 |
|                   | $\lambda = 7.50 \cdot b^{1.12}$ | Williams (1986)           | Rivers                 |
|                   | $\lambda = 20.0 \cdot b^{1.04}$ | Ferguson (1975)           | Rivers                 |
|                   | $\lambda = 6.28 \cdot b$        | Hey (1982)                | Rivers                 |
|                   | $\lambda = 6.31 \cdot b$        | Hey and Thorne (1986)     | Rivers                 |
|                   | $\lambda = 13.0 \cdot b$        | Marani et al. (2002)      | Tidal creeks           |
|                   | $\lambda = 10.5 - 31.4 \cdot b$ | Seminara (2006)           | Theory for forced bars |
| Meander amplitude | $A = 3.04 \cdot b^{1.10}$       | Leopold and Wolman (1960) | Rivers                 |
|                   | $A = 18.4 \cdot b^{0.99}$       | Inglis (1949)             | Rivers                 |
| Meander radius    | $r = 3.04 \cdot b^{1.10}$       | Leopold and Wolman (1960) | Rivers                 |
|                   | $r = 1.50 \cdot b^{1.12}$       | Williams (1986)           | Rivers                 |

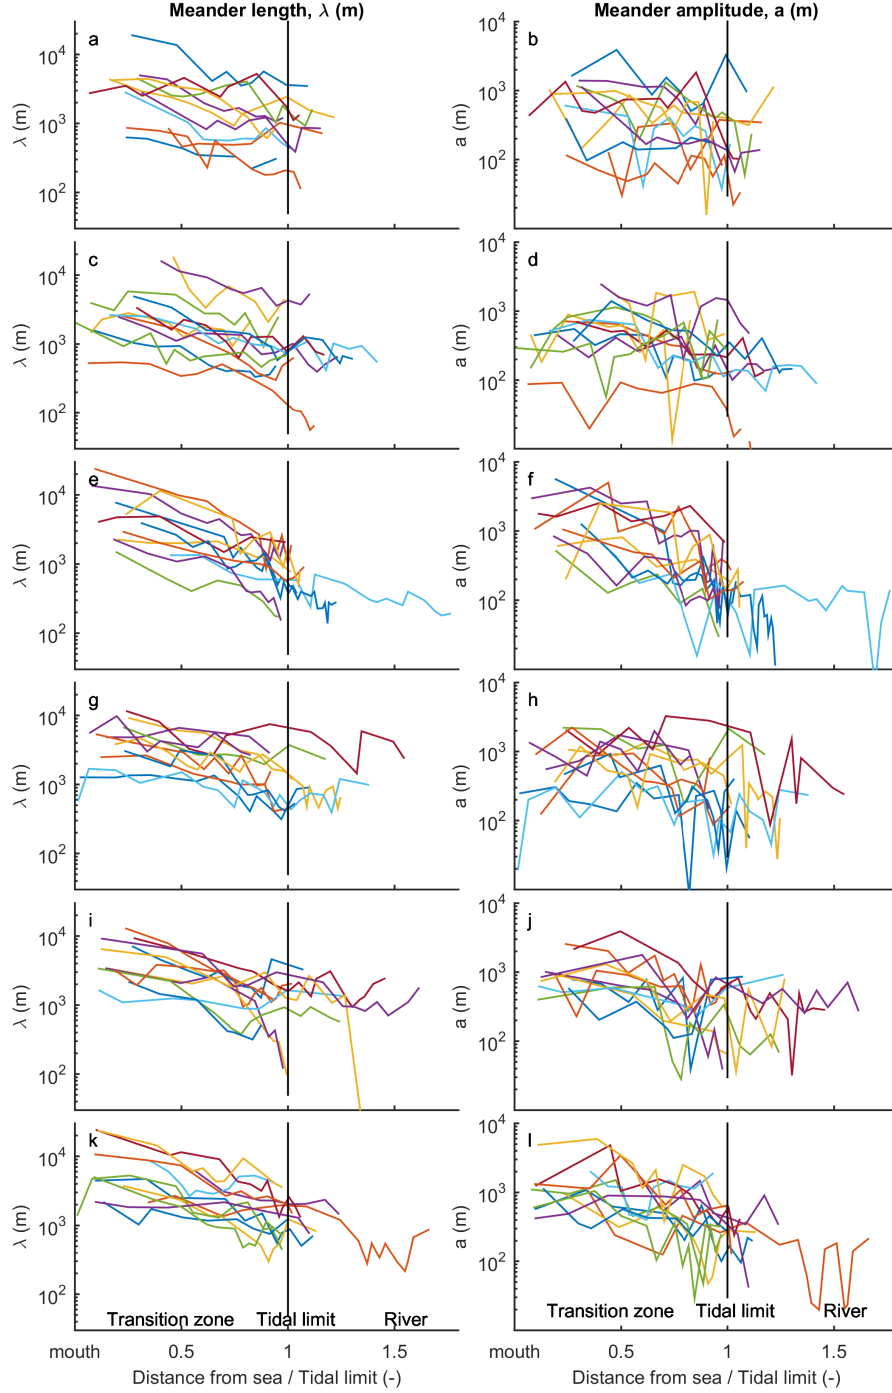

Figure 4: (left panels) Meander length and (right panels) amplitude as a function of dimensionless intrinsic coordinate, which was calculated as the along-channel distance from the sea measured along the channel centreline divided by the distance to the tidal limit. The tidal limit was determined as the location where channel width approaches a constant value. For visibility systems were separated over subplots: (a,b) system number 1-11; (c,d) 12-23; (e,f) 24-34; (g,h) 35-45; (i,j) 46-56; (k,l) 57-68. Numbers correspond to systems in Supplementary Table S2.

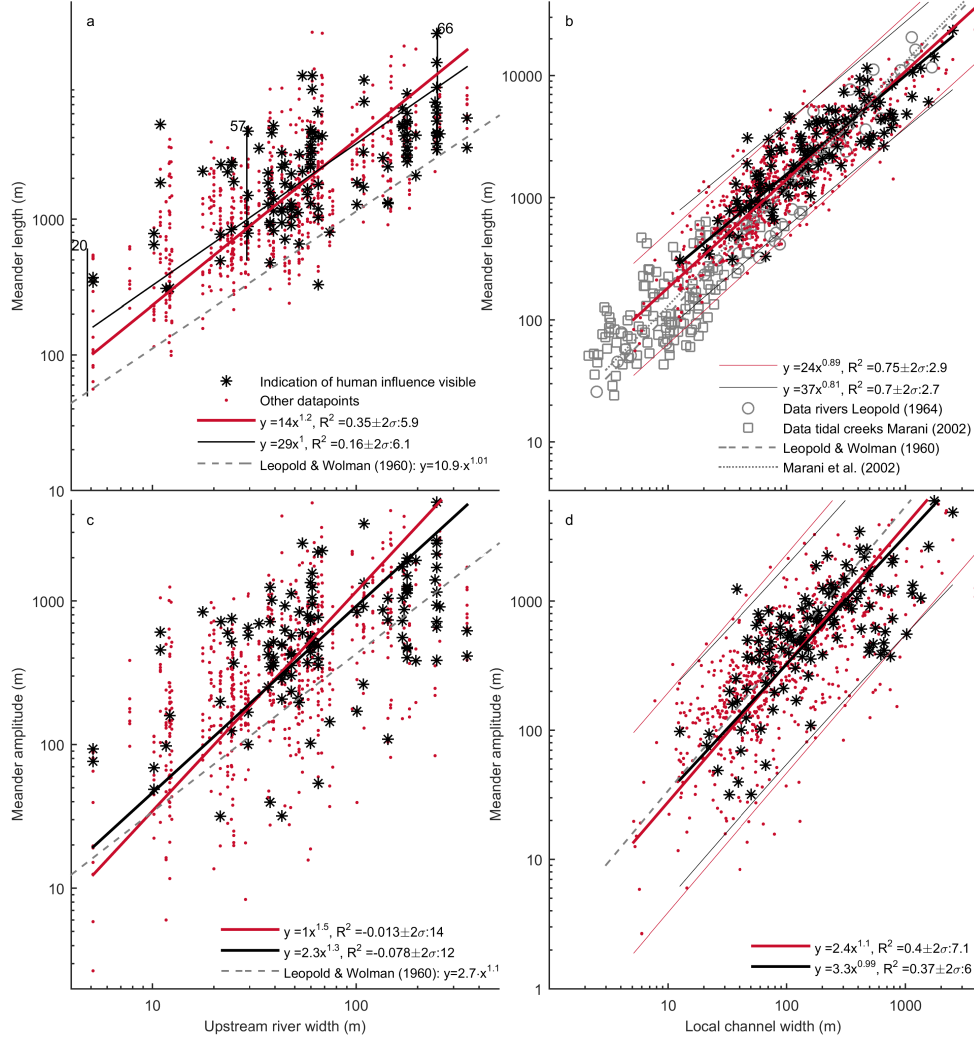

Figure 5: In the dataset, it was recorded at which locations human influence from aerial photographs may have influenced river pattern (similarly as in Kleinhans and van den Berg (2011) and Leuven et al. (2016)), such as the presence of harbours or sudden straight sections in a densely populated area. These locations are indicated as asterisks on top of the data in Fig. 2 of the article. The locations with possible human influence do not significantly deviate from the trends found and neither do they systematically increase scatter or cause outliers, as indicated by the largely overlapping confidence intervals.

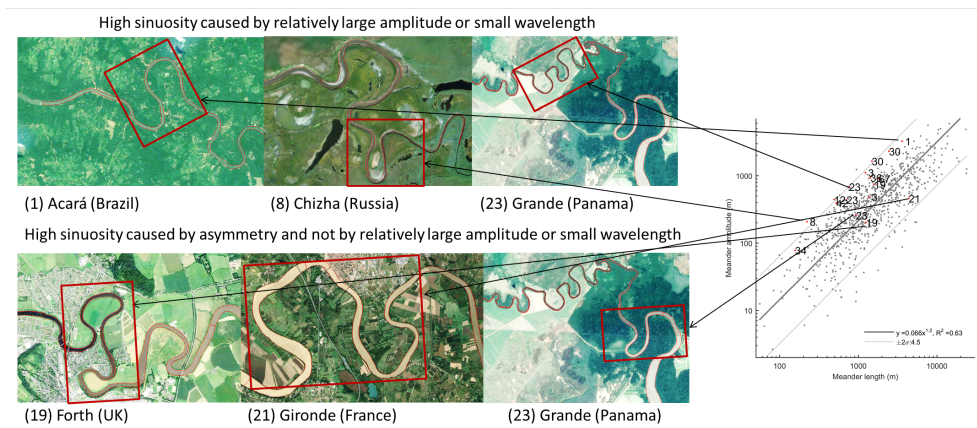

Figure 6: Examples of meanders with high sinuosity in Fig. 3. The plot on the right corresponds with Fig. 3b in the main article and indicates the numbers of the systems that have a meander with a sinuosity above 2.5. High sinuosities occur typically under two conditions: (1, top panels) the amplitude is disproportionally large or meander lengths disproportionally short, which typically plot close to the upper confidence limit when amplitude is plotted against length, (2, lower panels) along-channel distance is disproportionally large compared to the meander length, usually caused by asymmetry in meander bends, which plot on or below the regression line of amplitude against length.

Table 2: Rivers used in this study for meander measurements from Google Earth, accessed January-August 2017. Distance to the tidal limit was measured as along-channel distance from the mouth up to the point where channel width approaches a constant value. Climate zones: Am = Monsoon climate, Af = Equatorial climate, Aw = Tropical savanna climate, Cfa/Cwa = Humid subtropical climate, Cfb = Marine climate, Cwb = Oceanic subtropical highland climate, Csb = Temperate mediterranean climate, Dfc = Subarctic climate, Dfb = Temperate continental climate.

| Nr | Name             | Location         | Distance to tidal limit (km) | Köppen climate zone |
|----|------------------|------------------|------------------------------|---------------------|
| 1  | Acará            | Brazil           | 80                           | Aw, Am, Af          |
| 2  | Acarima          | New Zealand      | 8.1                          | Cfb                 |
| 3  | Alsea            | USA              | 25                           | Csb                 |
| 4  | Aurá             | Brazil           | 33                           | Aw                  |
| 5  | Barrow           | Ireland          | 35                           | Cfb                 |
| 6  | Belmunda         | Australia        | 15.5                         | Cwa                 |
| 7  | Charente         | France           | 40                           | Cfb                 |
| 8  | Chizha           | Russia           | 5.8                          | Dfc                 |
| 9  | Clwyd            | UK               | 6                            | Cfb                 |
| 10 | Cobequid         | Canada           | 34.5                         | Dfb                 |
| 11 | Conwy            | UK               | 14                           | Cfb                 |
| 12 | Cornwallis       | Canada           | 12                           | Dfb                 |
| 13 | Cree             | UK               | 12                           | Cfb                 |
| 14 | Dart             | UK               | 22                           | Cfb                 |
| 15 | Dovey            | UK               | 14                           | Cfb                 |
| 16 | Estero Real      | Nicaragua        | 42                           | Af                  |
| 17 | Exe              | UK               | 15                           | Cfb                 |
| 18 | Ferryside        | UK               | 23                           | Cfb                 |
| 19 | Forth            | UK               | 30                           | Cfb                 |
| 20 | Gannel           | UK               | 4                            | Cfb                 |
| 21 | Gironde          | France           | 90                           | Cfb                 |
| 22 | Girondesouth     | France           | 90                           | Cfb                 |
| 23 | Grande           | Panama           | 20                           | Aw                  |
| 24 | Hebert           | Canada           | 40                           | Dfb                 |
| 25 | Humber           | UK               | 90                           | Cfb                 |
| 26 | Kakadu           | Australia        | 80                           | Aw                  |
| 27 | Kennetcook       | Canada           | 16                           | Dfb                 |
| 28 | Koumala          | Australia        | 6.5                          | Cwa                 |
| 29 | L'Authie         | France           | 8                            | Cfb                 |
| 30 | Limpopo          | Mozambique       | 50                           | Aw                  |
| 31 | Loughor          | UK               | 27                           | Cfb                 |
| 32 | Maccan           | Canada           | 16                           | Dfb                 |
| 33 | Maputo           | Mozambique       | 45                           | Aw                  |
| 34 | Matola           | Mozambique       | 13.5                         | Aw                  |
| 35 | Mawddach         | UK               | 14                           | Cfb                 |
| 36 | Memracook        | Canada           | 16                           | Dfb                 |
| 37 | Mersey           | UK               | 43                           | Cfb                 |
| 38 | Merwe            | NL, historic map | 30                           | Cfb                 |
| 39 | Mucelo           | Mozambique       | 35                           | Aw                  |
| 40 | Nestucca         | USA              | 15                           | Csb                 |
| 41 | Ord              | Australia        | 60                           | Aw                  |
| 42 | Oreti            | New Zealand      | 25                           | Cfb                 |
| 43 | Ouse             | UK               | 36                           | Cfb                 |
| 44 | Pericumã         | Brazil           | 35                           | Aw                  |
| 45 | Pesca            | Mexico           | 60                           | Af                  |
| 46 | Petitcodiac      | Canada           | 40                           | Dfb                 |
| 47 | Púngué           | Mozambique       | 70                           | Aw                  |
| 48 | Roddsbay north   | Australia        | 12.5                         | Cfa                 |
| 49 | Roddsbay south   | Australia        | 13.6                         | Cfa                 |
| 50 | Salmon           | Canada           | 12                           | Dfb                 |
| 51 | Santa Maria      | Panama           | 15                           | Aw                  |
| 52 | Severn           | UK               | 45                           | Cfb                 |
| 53 | Shoyna           | Russia           | 13                           | Dfc                 |
| 54 | Shubenacadie     | Canada           | 30                           | Dfb                 |
| 55 | Solway           | UK               | 25                           | Cfb                 |
| 56 | Solwaysouth      | UK               | 25                           | Cfb                 |
| 57 | Tamar            | UK               | 25                           | Cfb                 |
| 58 | Tawtorridge      | UK               | 15                           | Cfb                 |
| 59 | Tawtorridgesouth | UK               | 18                           | Cfb                 |
| 60 | Tembe            | Mozambique       | 35                           | Aw                  |
| 61 | Tempisque        | Costa Rica       | 34                           | Aw                  |
| 62 | Thames           | UK               | 90                           | Cfb                 |
| 63 | Trent            | UK               | 90                           | Cfb                 |
| 64 | Usk              | UK               | 16                           | Cfb                 |
| 65 | Wairoa           | New Zealand      | 50                           | Cfb                 |
| 66 | Westerschelde    | NL               | 110                          | Cfb                 |
| 67 | Wye              | UK               | 18                           | Cfb                 |
| 68 | Wyre             | UK               | 20                           | Cfb                 |
